# Supplementary material
Source: ML conference proceedings conference paper supplement (https://proceedings.neurips.cc/paper_files/paper/2023/hash/7ffb9f1b57628932518505b532301603-Abstract.html)
Supplement: Supplementary file 1 [file 7ffb9f1b57628932518505b532301603-Supplemental-Conference.pdf]

## A Implementation Details

**Training.** Our training settings follow [24] and we build on the open-source implementation of MAEs (<https://github.com/facebookresearch/mae>) for all our experiments. We use the parameters specified in the original implementation unless specified otherwise in Table 4a. All our experiments are performed on 4 Nvidia Titan RTX GPUs for ViT-S/16 models, and on 8 Nvidia Titan RTX GPUs for ViT-S/8 models.

**Evaluation methodology.** Our evaluation methodology follows prior work [14–16] and in Table 1 we report results previously reported in these studies. For recent self-supervised learning approaches like DINO, MAEs, MAE-ST and VideoMAE, we carry out a comprehensive grid search on the evaluation hyperparameters listed in Table 4b, and report the optimal results obtained. The evaluation parameters for SiamMAE can be found in Table 4b.

| config                 | value                              |                   |       |     |
|------------------------|------------------------------------|-------------------|-------|-----|
| optimizer              | AdamW [100]                        |                   |       |     |
| optimizer momentum     | $\beta_1, \beta_2=0.9, 0.95$ [103] |                   |       |     |
| weight decay           | 0.05                               |                   |       |     |
| learning rate          | 1.5e-4                             | config            | DAVIS | VIP |
| learning rate schedule | cosine decay [104]                 | top-k             | 7     | 10  |
| warmup epochs [105]    | 40                                 | queue length      | 20    | 20  |
| epochs                 | 2000 (ablations 400)               | neighborhood size | 20    | 8   |
| repeated sampling [99] | 2                                  |                   |       | 20  |
| augmentation           | hflip, crop [0.5, 1]               |                   |       |     |
| batch size             | 2048                               |                   |       |     |
| frame sampling gap     | [4, 48]                            |                   |       |     |

(a) Kinetics pre-training setting.

(b) Evaluation setting.

Table 4: Training and evaluation hyperparameters.
